# Supplementary material
Source: PubMed Central journal article supplement (PMC3058518)
Supplement: NIHMS222173-supplement-Supplementary_Data.pdf [file NIHMS222173-supplement-Supplementary_Data.pdf]

## Supplemental Materials

### Force field parameters for naproxen

To parameterize naproxen we used standard CHARMM19 atom types. The charges were assigned consistent with the standard charges in the CHARMM19 force field and SASA implicit solvent model. Charges in the methoxy group were assigned using the parameterization of trimethoprim molecule [1]. The bond length and bond angle terms were autogenerated. The dihedral and improper angle potentials were transferred from structurally analogous amino acids Glu and Val (for carboxylate group in naproxen), Phe and Trp (for naphthalene ring), and Tyr (for methoxy group). Additional improper angle for C14 atom (Fig. 1c in the paper) was introduced as in branched side chain of Ile. The topology description of naproxen molecule in CHARMM19 force field is given below:

```
RESI NPXN      0.00000  ! naproxen

!
!           C7      C12      C14
!          // \    /  \    |
!          C8      C6      C11-C13-C15--O16
!          |       ||      |
!          C3      C5      C10      O17
!         / \    /  \  //
!        C1--O2  C4    C9

GROUP
ATOM C1  CH3E    0.15
ATOM O2  OS      -0.30
ATOM C3  CR      0.15
GROUP
ATOM C4  CR1E    0.00
ATOM C5  CR      0.00
ATOM C6  CR      0.00
ATOM C7  CR1E    0.00
ATOM C8  CR1E    0.00
ATOM C9  CR1E    0.00
ATOM C10 CR1E    0.00
ATOM C11 CR      0.00
ATOM C12 CR1E    0.00
GROUP
ATOM C13 CH1E    -0.15
ATOM C14 CH3E    0.00
ATOM C15 C      1.35
ATOM O16 OC     -0.60
ATOM O17 OC     -0.60
```

|      |     |     |      |     |        |        |         |        |        |     |
|------|-----|-----|------|-----|--------|--------|---------|--------|--------|-----|
| BOND | C1  | O2  | O2   | C3  | C3     | C4     | C4      | C5     | C5     | C6  |
| BOND | C6  | C7  | C7   | C8  | C8     | C3     | C5      | C9     | C9     | C10 |
| BOND | C10 | C11 | C11  | C12 | C12    | C6     | C11     | C13    | C13    | C14 |
| BOND | C13 | C15 | C15  | O16 | C15    | O17    |         |        |        |     |
| DIHE | C4  | C3  | O2   | C1  |        |        |         |        |        |     |
| DIHE | C11 | C13 | C15  | O17 | C12    | C11    | C13     | C15    |        |     |
| DIHE | C4  | C5  | C6   | C12 | C7     | C6     | C5      | C9     |        |     |
| DIHE | C8  | C6  | C5   | C10 | C8     | C5     | C6      | C11    |        |     |
| IMPH | C3  | C4  | C8   | O2  | C13    | C15    | C14     | C11    |        |     |
| IMPH | C15 | O16 | O17  | C13 | C11    | C10    | C12     | C13    |        |     |
| IMPH | C3  | C4  | C5   | C6  | C4     | C5     | C6      | C7     | C5     | C6  |
| IMPH | C6  | C7  | C8   | C3  | C7     | C8     | C3      | C4     | C8     | C3  |
| IMPH | C5  | C9  | C10  | C11 | C9     | C10    | C11     | C12    | C10    | C11 |
| IMPH | C11 | C12 | C6   | C5  | C12    | C6     | C5      | C9     | C6     | C5  |
| IC   | C1  | O2  | C3   | C4  | 0.0000 | 000.00 | 180.00  | 000.00 | 0.0000 |     |
| IC   | O2  | C4  | *C3  | C8  | 0.0000 | 000.00 | 180.00  | 000.00 | 0.0000 |     |
| IC   | C3  | C4  | C5   | C6  | 0.0000 | 000.00 | 0.00    | 000.00 | 0.0000 |     |
| IC   | C4  | C5  | C6   | C7  | 0.0000 | 000.00 | 0.00    | 000.00 | 0.0000 |     |
| IC   | C5  | C6  | C7   | C8  | 0.0000 | 000.00 | 0.00    | 000.00 | 0.0000 |     |
| IC   | C10 | C9  | C5   | C6  | 0.0000 | 000.00 | 0.00    | 000.00 | 0.0000 |     |
| IC   | C9  | C5  | C6   | C12 | 0.0000 | 000.00 | 0.00    | 000.00 | 0.0000 |     |
| IC   | C5  | C6  | C12  | C11 | 0.0000 | 000.00 | 0.00    | 000.00 | 0.0000 |     |
| IC   | C6  | C4  | *C5  | C9  | 0.0000 | 000.00 | 180.00  | 000.00 | 0.0000 |     |
| IC   | C5  | C7  | *C6  | C12 | 0.0000 | 000.00 | 180.00  | 000.00 | 0.0000 |     |
| IC   | C10 | C12 | *C11 | C13 | 0.0000 | 000.00 | 180.00  | 000.00 | 0.0000 |     |
| IC   | C12 | C11 | C13  | C15 | 0.0000 | 000.00 | 0.00    | 000.00 | 0.0000 |     |
| IC   | C11 | C15 | *C13 | C14 | 0.0000 | 000.00 | -120.00 | 000.00 | 0.0000 |     |
| IC   | C11 | C13 | C15  | O16 | 0.0000 | 000.00 | 0.00    | 000.00 | 0.0000 |     |
| IC   | C13 | O16 | *C15 | O17 | 0.0000 | 000.00 | 120.00  | 000.00 | 0.0000 |     |

The following parameters for bond, dihedral and improper angle potentials were added:

|        |      |      |      |       |   |          |
|--------|------|------|------|-------|---|----------|
| ANGLES |      |      |      |       |   |          |
| CR1E   | CR   | CH1E | 70.0 | 121.5 |   |          |
| CR     | CH1E | C    | 70.0 | 112.5 |   |          |
| CR     | CH1E | CH3E | 70.0 | 106.5 |   |          |
| CR     | CR1E | CR   | 90.0 | 119.0 |   |          |
| CR     | OS   | CH3E | 46.5 | 120.5 |   |          |
| CR1E   | CR   | OS   | 65.0 | 119.0 |   |          |
| DIHE   |      |      |      |       |   |          |
| CR1E   | CR   | CH1E | C    | 1.6   | 3 | 0.0      |
| CR1E   | CR   | OS   | CH3E | 1.8   | 2 | 180.0    |
| IMPHI  |      |      |      |       |   |          |
| CR     | CR1E | CR1E | CH1E | 90.0  | 0 | 0.0      |
| CH1E   | C    | CH3E | CR   | 55.0  | 0 | 35.26439 |
| CR     | CR1E | CR1E | OS   | 150.0 | 0 | 0.0      |

The solvation parameters for ester OS atom were set equal to those of hydroxyl oxygen. The transferred intramolecular terms in CHARMM19 were checked by building the naproxen molecule by analogy in the all-atom CHARMM general force field [2]. The energy minimized structures in both force fields were very similar (RMSD  $\sim 0.35$  Å).

### Convergence of REMD simulations

The convergence of REMD sampling of A $\beta$ -naproxen interactions was tested using the number  $N_s$  of the unique states ( $E_{eff}, L_e$ ) sampled at least once in the course of simulations. Each state ( $E_{eff}, L_e$ ) is defined by the effective energy of the simulation system,  $E_{eff}$ , which includes the potential and solvation energies, and by the number of ligands  $L_e$  bound to the fibril edge  $e=$ CX or CV (Fig. 1b). Fig. S1 shows  $N_s$  as a function of the cumulative equilibrium simulation time  $\tau_{sim}$ . As  $\tau_{sim}$  exceeds roughly 10  $\mu$ s  $N_s$  levels off suggesting the onset of approximate convergence of REMD simulations. The convergence of A $\beta$ -naproxen simulations is very similar to that observed in our previous simulations of binding ibuprofen molecules to A $\beta$  fibril (ref. [35] in the paper).

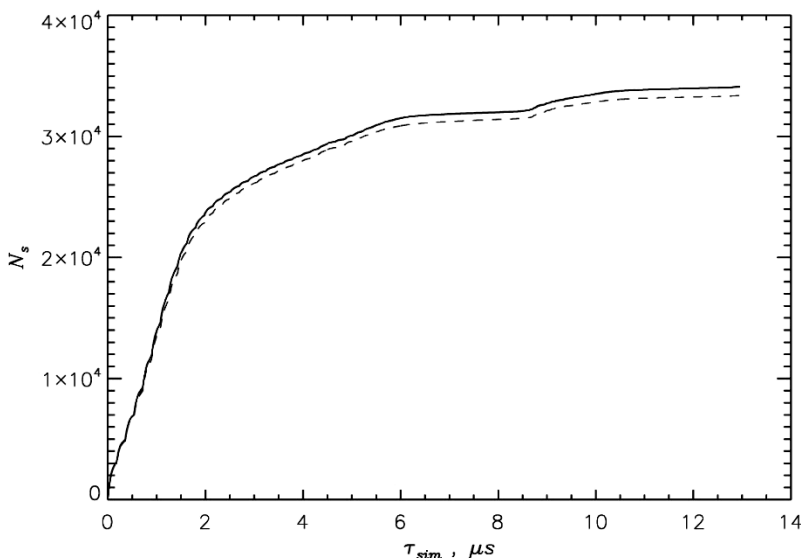

**Fig. S1** The numbers of unique states  $N_s$  sampled in the course of REMD simulations as a function of cumulative equilibrium simulation time  $\tau_{sim}$ . The solid and dashed lines correspond to  $N_s$  computed for the naproxen molecules bound to different edges of A $\beta$  fibril.

To further test the reliability of REMD sampling we divided the simulation data into two equal subsets and analyzed them independently. The thermodynamic quantities from the two subsets related to naproxen interactions with A $\beta$  fibril differed by no more than 8% from the averages computed using the entire dataset. The quantities related to naproxen-naproxen interactions have the errors not exceeding 10%. The convergence of A $\beta$ -ibuprofen REMD simulations is reported in ref. [35] in the paper.

## Testing force field parameterization of naproxen

Bednarek *et al* have performed the conformational analysis of naproxen using *ab initio* methods and NMR technique at 300K (ref. [52] in the paper). Among the quantities considered were the distributions of two dihedral angles  $\phi$  and  $\chi$ . These angles are defined by the atoms C12-C11-C13-C15 and C1-O2-C3-C4 in Fig. 1c. Theoretical analysis of naproxen revealed three peaks in the distribution of  $\phi$  at  $\approx -116^\circ$ ,  $\approx -43^\circ$  and  $\approx 126^\circ$  with the populations of 0.11, 0.18, and 0.70. The distribution of  $\chi$  dihedral angle has a single maximum at  $\approx -3^\circ$  with the population of 0.8. The existence of three states in the distribution of  $\phi$  dihedral angle was supported by NMR data. To test naproxen parameterization in CHARMM19 force field we computed the probability distributions  $P(\phi)$  and  $P(\chi)$  at 330K, i.e., at the lowest temperature at which conformational states were collected in REMD. Fig. S2 shows that  $P(\phi)$  has three maxima, at  $\approx -175^\circ$  and  $\approx -43^\circ$ , and  $\approx 58^\circ$ . The populations of these states are 0.06, 0.14, and 0.80, respectively. According to Fig. S2 the distribution  $P(\chi)$  has two peaks of equal amplitude at  $\approx -180^\circ$  and  $\approx -6^\circ$ .

When compared against *ab initio* data CHARMM19 force field reproduces the number of peaks in  $P(\phi)$  and approximately their location. Our parameterization of naproxen also correctly predicts the statistical weights of the three peaks. The largest discrepancy between our and *ab initio* results is the location of the dominant peak #3. The impact of this difference on ligand binding can be assessed using our previous simulations of ibuprofen binding to A $\beta$  fibril (ref. [35] in the paper and unpublished data). Ibuprofen has chemically identical group G3 (Fig. 1c) with the equivalent dihedral angle  $\phi$  formed by C3-C4-C7-C8. For  $\phi$  we have tested two versions of dihedral angle potential, first with zero amplitude (which facilitates free rotation around  $\phi$ ) and the second identical to the one used in naproxen. These potentials result in sharply different distributions  $P(\phi)$  at 330K. The first leads to the appearance of two peaks of equal height at  $\approx -120^\circ$  and  $\approx 60^\circ$ . The second results in the distribution almost identical to that in Fig. S2. Interestingly, differences in the parameterizations have negligible impact on binding to A $\beta$  fibril. For example, the numbers of ligands bound to the fibril CX and CV edges vary between the parameterizations by 4 and 1%, respectively. The difference in the free energy of binding is less than 1%. These findings suggest that the exact location of the maximum #3 in  $P(\phi)$  should not significantly affect naproxen binding to A $\beta$  fibril.

The peak #1 in the distribution  $P(\chi)$  computed from our simulations (Fig. S2) coincides with that obtained from *ab initio* calculations (ref. [52] in the paper). However, CHARMM19 simulations predict the existence of the second maximum of equal amplitude that is at variance with the *ab initio* data. It is worth noting that our energetics analysis (see Results) suggests that the group G2 plays minor role in naproxen binding compared to G1 or G3. Therefore, the specific form of the distribution  $P(\chi)$  is not likely to be important for naproxen binding to A $\beta$  fibril. A reasonable agreement between the conformational ensembles obtained from *ab initio* calculations and our simulations supports the CHARMM19 parameterization of naproxen.

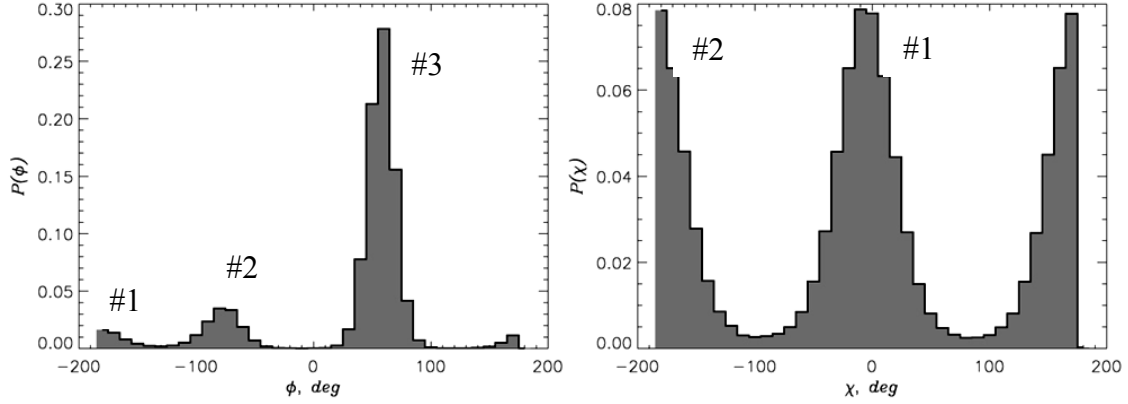

**Fig. S2** Probability distributions,  $P(\phi)$  and  $P(\chi)$ , of naproxen dihedral angles  $\phi$  and  $\chi$  (Fig. 1c) computed at 330K.  $P(\phi)$  and  $P(\chi)$  serve as tests of the naproxen parameterization. The distributions  $P(\phi)$  and  $P(\chi)$  are computed for all naproxen molecules irrespective of their binding state. We checked that binding has a minor impact on these distributions that allows us to directly compare them with the *ab initio* dihedral angle distributions computed for a single molecule.

### Distribution of ibuprofen on the fibril edges

To compare binding of naproxen and ibuprofen we computed the distributions of bound ibuprofen molecules  $\langle L(S_c) \rangle$  at 360K (Fig. S3). In contrast to naproxen (Fig. 4b) ibuprofen tends to form small clusters upon binding to A $\beta$  fibril. The numbers of ligands bound to the CV and CX edges are  $\langle L_{CV} \rangle \approx 13.5$  and  $\langle L_{CX} \rangle \approx 12.1$ , of which 5.8 and 3.0 are included in large clusters. Therefore, the fractions of ibuprofen molecules forming large clusters are  $\phi_{CV} = 0.43$  and  $\phi_{CX} = 0.25$ .

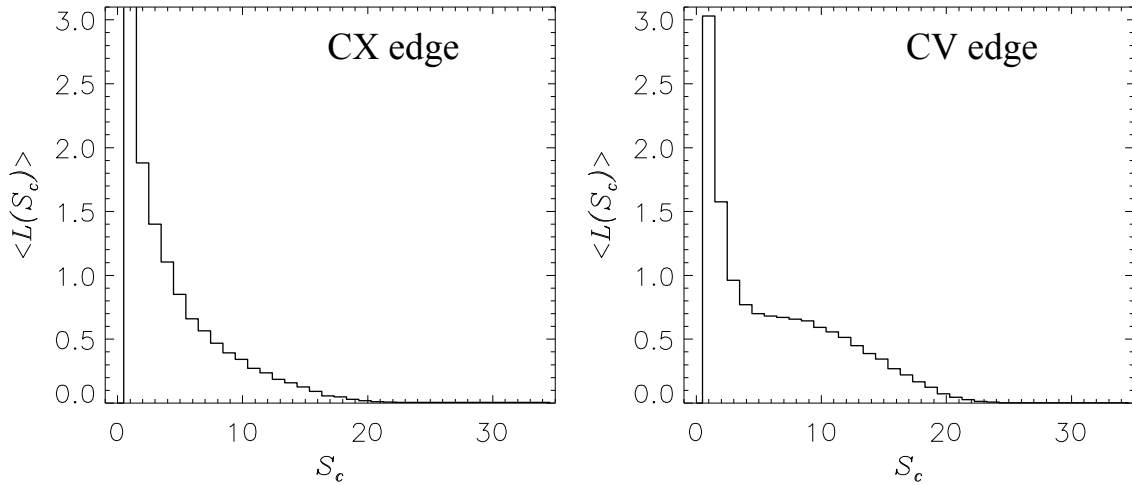

**Fig. S3** Distributions of the numbers of bound ibuprofen ligands  $\langle L(S_c) \rangle$  with respect to cluster size  $S_c$  on the CX and CV edges.

## Binding mechanism for modified naproxen

To provide direct test of the importance of interligand interactions for binding we performed simulations of modified naproxen. We used the same simulation system as described in Materials and Methods with the exception that all non-bonded interactions between naproxen molecules were switched off. This modification of energy function radically changes naproxen binding. The binding temperature is reduced from 398K to <330K and the difference in edge binding affinities is eliminated. Fig. S4 compares the numbers of ligands bound to the CV and CX edges,  $\langle L_{CV} \rangle$  and  $\langle L_{CX} \rangle$ , for the original and modified naproxen ligands. It is seen that cancelation of non-bonded interligand interactions erases the difference between  $\langle L_{CV} \rangle$  and  $\langle L_{CX} \rangle$  in the entire temperature range. For example, at 360K  $\langle L_{CV} \rangle \approx 8.6$  and  $\langle L_{CX} \rangle \approx 8.5$ . Furthermore, the cluster distributions  $\langle L(S_c) \rangle$  for the modified naproxen become unimodal, because the formation of large clusters is completely blocked ( $\phi_{CV} = \phi_{CX} \approx 0$ ). These findings strengthen our conclusion that the interligand interactions are one of the two key factors controlling binding.

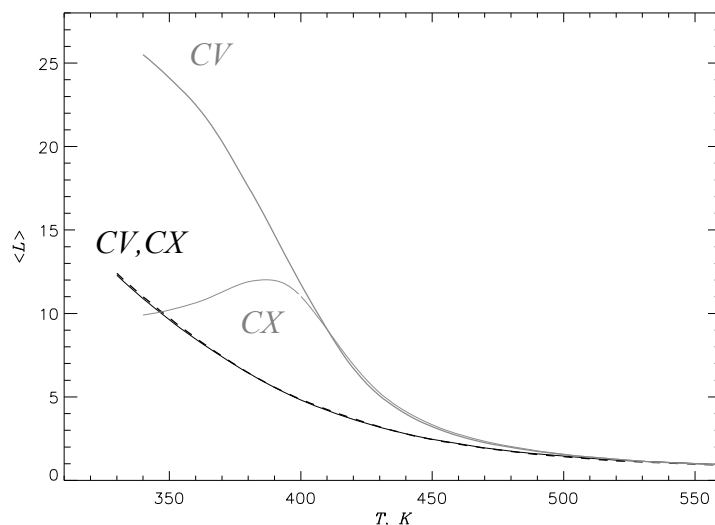

**Fig. S4** The numbers of naproxen molecules  $\langle L \rangle$  bound to the CV and CX edges vs temperature. The data for the naproxen ligands, in which non-bonded interligand interactions are switched off, are shown in black: thin and dashed lines represent  $\langle L \rangle$  computed for the CV and CX. The data in grey represent the “original” naproxen simulations (as shown in Fig. 3a): thick and thin lines mark binding to the CV and CX edges. The plot suggests that cancelation of interligand interactions makes binding affinities of the edges equal.

## Ordering of bound naproxen molecules

To check mutual ordering of naproxen ligands, which may occur upon binding to the fibril, we computed the probability distribution  $P(\cos(\phi))$  of the angles  $\phi$  formed by naphthalene rings. To this end, for each bound naproxen molecule we define a vector  $\vec{n}$ , which is the cross product of the vectors  $\vec{r}_1 = \vec{R}(\text{C11}) - \vec{R}(\text{C3})$  and  $\vec{r}_2 = \vec{R}(\text{C10}) - \vec{R}(\text{C8})$ ,

where  $\vec{R}$  are the radius vectors of naproxen carbon atoms (Fig. 1c). Due to planarity of naphthalene ring  $\vec{n}$  describes its orientation. The angle  $\phi$  is then obtained from the scalar product of the vectors  $\vec{n}_i$  and  $\vec{n}_j$  computed for the bound naproxen molecules  $i$  and  $j$ , which are in contact with each other. The distribution  $P(\cos(\phi))$  is plotted in Fig. S5.

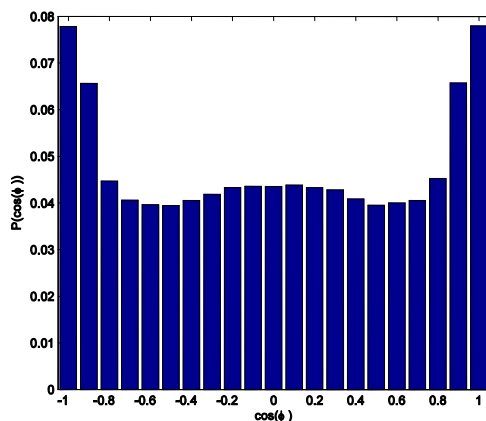

**Fig. S5** Probability distribution  $P(\cos(\phi))$  of the angles  $\phi$  for the pairs of interacting naproxen molecules bound to the fibril. The plot suggests that parallel alignment of naproxen molecules is preferred.

## References

- [1] Fleischman, S. H. and Brooks, C. L, 1990. Protein-Drug interactions: Characterization of inhibitor binding in complexes of DHFR with trimethoprim and related derivatives. *Proteins Struct. Funct. Bioinform.* **7**, 52-61.
- [2] Vanommeslaeghe, K., Hatcher, E., Acharya, C., Kundu, S., Zhong, S., Shim, J., Darian, E., Guvench, O., Lopes, P., Vorobyov, I., MacKerell, A. D., Jr., 2010. CHARMM General Force Field (CGenFF): A force field for drug-like molecules compatible with the CHARMM all-atom additive biological force fields. *J. Comp. Chem.* **31**, 671-690.
